# Supplementary material for: Catalytic properties of α-MnO2 for Li–air battery cathodes: a density functional investigation
Source: Royal Society of Chemistry journal article supplement (doi:10.1039/c9cp06081b), 2020-01-01
Supplement: c9cp06081b1.pdf [file c9cp06081b1.pdf]

## Supplementary Information

### Catalytic properties of $\alpha$ - $\text{MnO}_2$ for Li-air battery cathodes: a density functional investigation

Khorsed Alam<sup>a</sup> and Nicola Seriani<sup>b</sup> and Prasenjit Sen<sup>a</sup>

<sup>a</sup>*Harish-Chandra Research Institute, HBNI,  
Chhatnag Road, Jhansi, Allahabad 211019, India.*

<sup>b</sup>*Abdus Salam International Centre for Theoretical Physics, Strada Costiera 11, Trieste, Italy.*

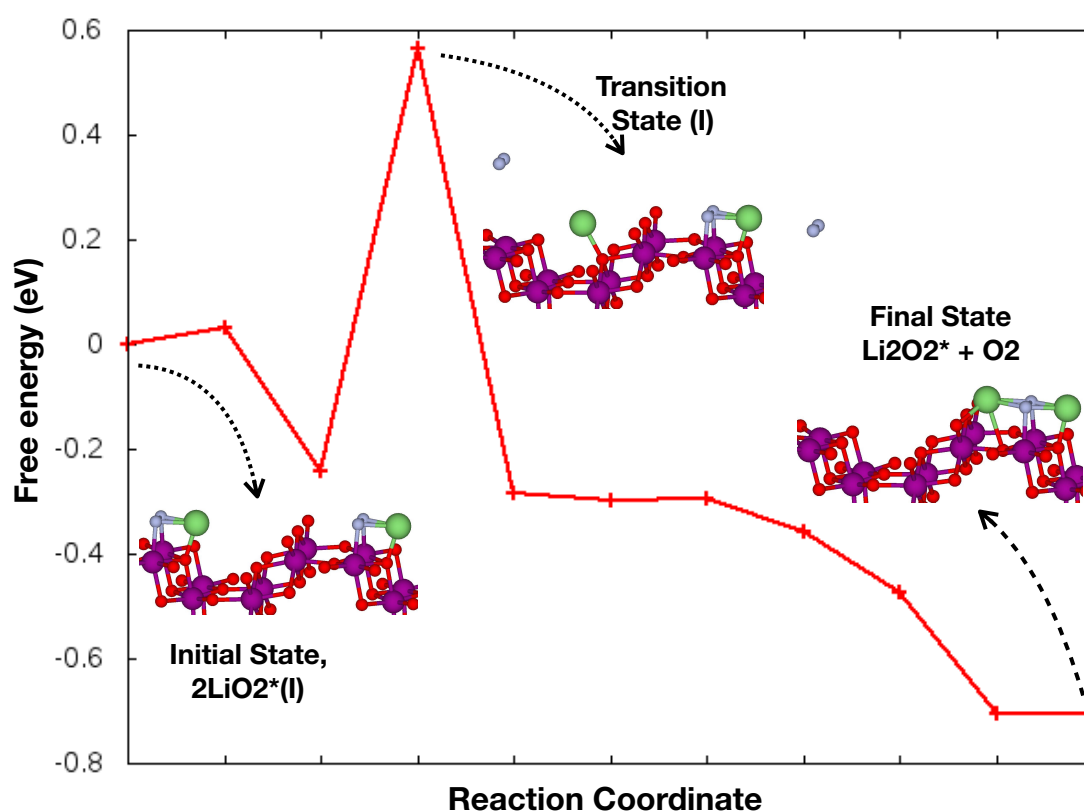

Figure S1: Free energies along the minimum energy path for the disproportionation reaction  $2\text{LiO}_2^*(\text{I}) \rightarrow \text{Li}_2\text{O}_2^* + \text{O}_2$  along path 1. Correction to the GGA energy of an isolated  $\text{O}_2$  has been applied to all images except the first two in which  $\text{O}_2$  is adsorbed on the surface. For the same reason, to calculate free energies,  $\text{ZPE} - TS$  of the isolated  $\text{O}_2$  molecule has been added to the energies of all the images except the first two.

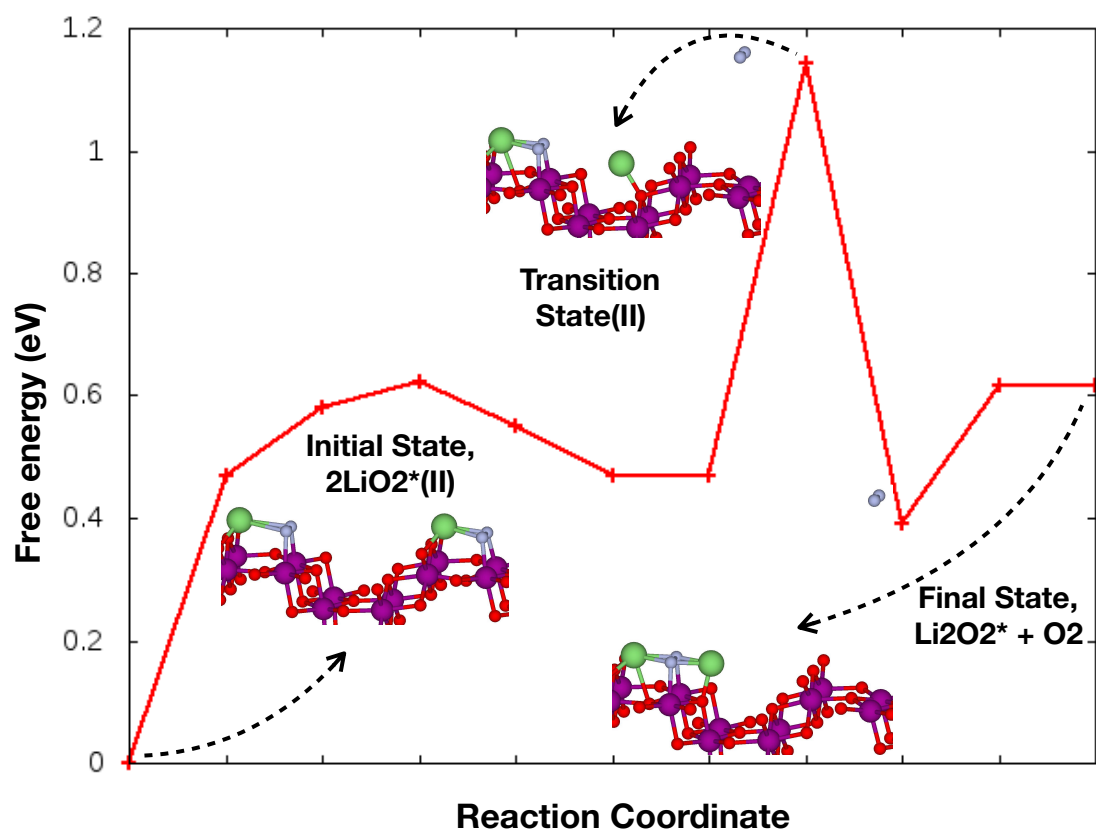

Figure S2: Free energies along the MEP of the disproportionation reaction  $2\text{LiO}_2^*(\text{II}) \rightarrow \text{Li}_2\text{O}_2^* + \text{O}_2$  along path 2. Same procedure as in case of path 1 has been used.
